# Supplementary material for: Design of short peptides to block BTLA/HVEM interactions for promoting anticancer T-cell responses
Source: PubMed Central journal article supplement (PMC5464627; doi:10.1371/journal.pone.0179201), 2017-06-08

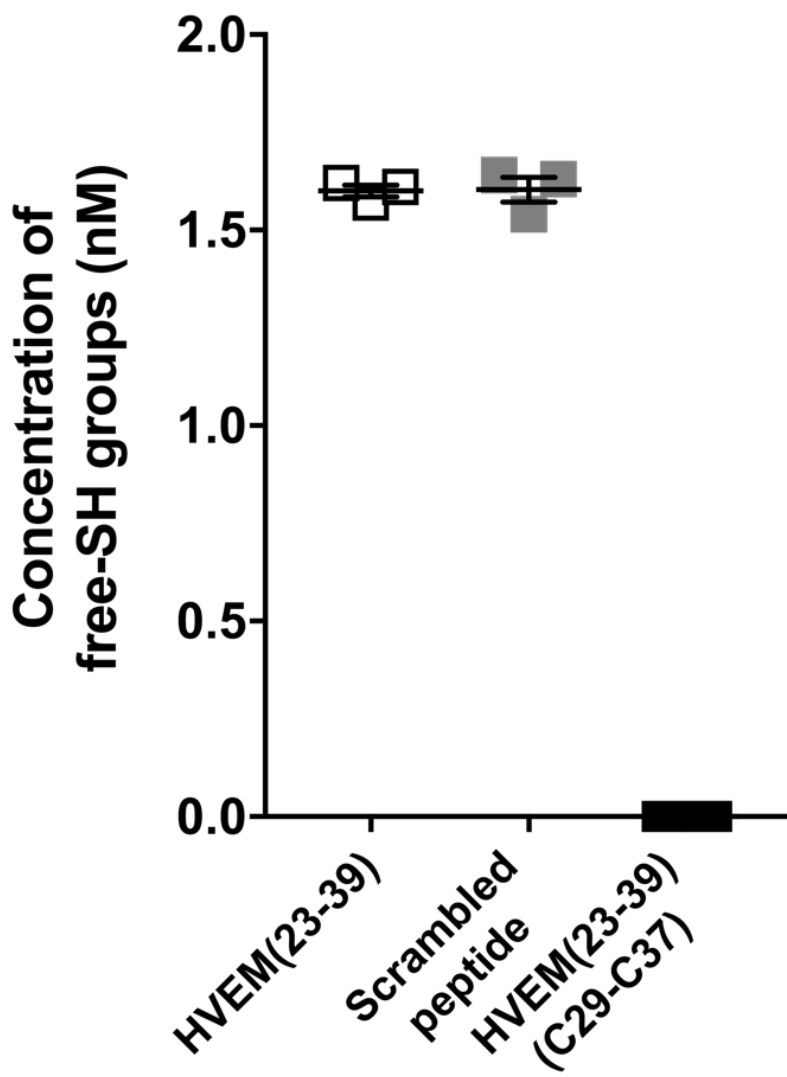

Supplement: pone.0179201.s002.pdf [file pone.0179201.s002.pdf]
