# Supplementary material for: Design of short peptides to block BTLA/HVEM interactions for promoting anticancer T-cell responses
Source: PubMed Central journal article supplement (PMC5464627; doi:10.1371/journal.pone.0179201), 2017-06-08
Supplement: pone.0179201.s003.pdf [file pone.0179201.s003.pdf]

**S1 Table.**

| Connected residues |          | % of structures where the bond is found |
|--------------------|----------|-----------------------------------------|
| Arg42 sc           | Arg31 sc | 51.2%                                   |
| Arg42 bb           | Glu31 bb | 96.4%                                   |
| Glu125 bb          | Thr35 bb | 96.8%                                   |
| Leu123 bb          | Cys37 bb | 96.4%                                   |
| Gln37 sc           | Gly34 bb | 84.4%                                   |
| His127 sc          | Gly30 bb | 84%                                     |
| Asn122 sc          | Lys26 sc | 24%                                     |
